# Supplementary material for: PbS Quantum Dots-Decorated BiVO4 Photoanodes for Highly Efficient Photoelectrochemical Hydrogen Production
Source: MDPI journal article supplement (doi:10.3390/nano13050799), 2023-02-22
Supplement: s1 [file s1]

Supplementary Materials

# PbS Quantum Dots Decorated BiVO<sub>4</sub> Photoanodes for Highly Efficient Photoelectrochemical Hydrogen Production

Joo-Won Seo <sup>†</sup>, Seung-Beom Ha <sup>†</sup>, In-Cheul Song and Jae-Yup Kim <sup>\*</sup>

Department of Chemical Engineering, Dankook University, Yongin 16890, Republic of Korea

<sup>\*</sup> Correspondence: jykim@dankook.ac.kr

<sup>†</sup> These authors contributed equally to this work.

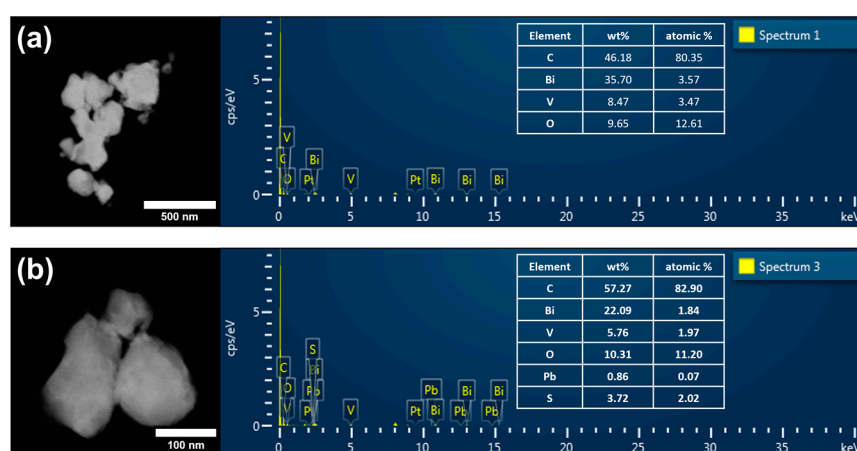

**Figure S1.** TEM images and relevant EDX spectra of each element with the relative concentration for (a) bare BiVO<sub>4</sub> and (b) BiVO<sub>4</sub>/PbS QDs.

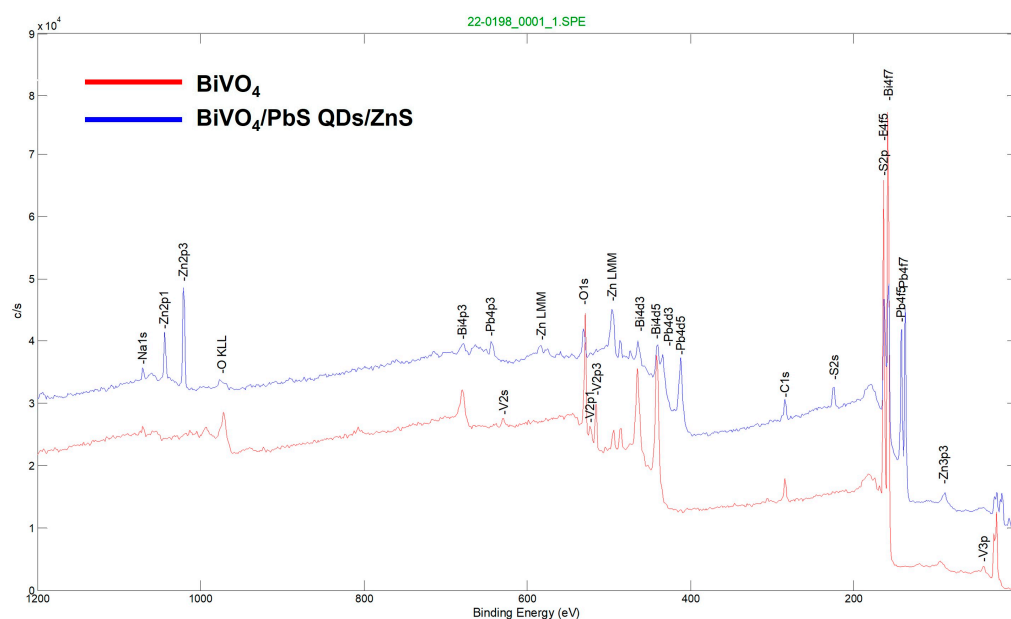

**Figure S2.** Survey XPS scans of bare BiVO<sub>4</sub> and BiVO<sub>4</sub>/PbS QDs/ZnS films.

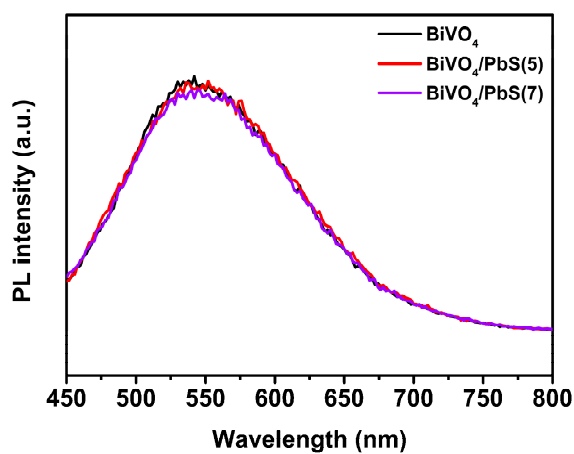

**Figure S3.** Steady-state PL spectra of bare  $\text{BiVO}_4$  and  $\text{BiVO}_4/\text{PbS}(n)$  QDs films ( $n$ : the number of PbS SILAR cycles).

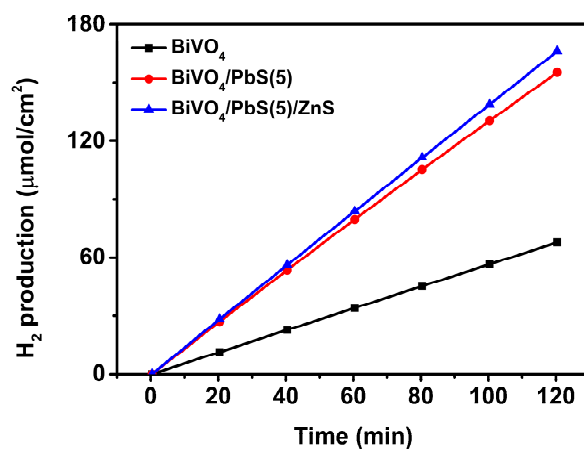

**Figure S4.** Calculated theoretical hydrogen production of bare  $\text{BiVO}_4$ ,  $\text{BiVO}_4/\text{PbS}(5)$  QDs, and  $\text{BiVO}_4/\text{PbS}(5)$  QDs/ZnS photoanodes, based on chronoamperometric curves (at  $1.23 \text{ V}_{\text{RHE}}$ ).

**Table S1.** Previously reported performances of BiVO<sub>4</sub> photoelectrodes for PEC hydrogen production.

| Photoelectrode                                                            | Electrolyte conditions                                                                    | Photocurrent density (mA/cm <sup>2</sup> ) | Retention of photocurrent | Reference        |
|---------------------------------------------------------------------------|-------------------------------------------------------------------------------------------|--------------------------------------------|---------------------------|------------------|
| BiVO <sub>4</sub> /NiFeO <sub>x</sub>                                     | 1.0 M borate buffer (pH = 9.5)                                                            | 6.24 (at 1.23 V vs. RHE)                   | ~100 % (after 80 h)       | [14]             |
| TiO <sub>2-x</sub> /BiVO <sub>4</sub>                                     | 0.5 M KPi buffer (pH = 7)                                                                 | 6.12 (at 1.23 V vs. RHE)                   | ~ 83 % (after 100 h)      | [15]             |
| Mo-BiVO <sub>4</sub> /B-C <sub>3</sub> N <sub>4</sub> /NiFeO <sub>x</sub> | potassium phosphate buffer with 0.5 M Na <sub>2</sub> SO <sub>3</sub> (pH=7)              | ~6 (at 1.23 V vs. RHE)                     | 92% (after 10 h)          | [52]             |
| BiVO <sub>4</sub> /FeOOH/NiOOH                                            | 1.0 M potassium borate with 0.2 M Na <sub>2</sub> SO <sub>3</sub> (pH = 9.5)              | 5.87 (at 1.23 V vs. RHE)                   | ~ 97 % (after 10 h)       | [53]             |
| BiVO <sub>4</sub> /FeOOH                                                  | 0.5 M borate buffer (pH = 9.5)                                                            | 4.71 (at 1.23 V vs. RHE)                   | ~ 100 % (after 11 h)      | [54]             |
| Ar plasma treated BiVO <sub>4</sub>                                       | potassium phosphate buffer with 1.0 M Na <sub>2</sub> SO <sub>3</sub> (pH=7)              | 4.32 (at 1.23 V vs. RHE)                   | ~ 100% (after 45h)        | [55]             |
| BiVO <sub>4</sub> /Co(salophen)                                           | 0.1 M phosphate buffer (pH=7)                                                             | 4.27 (at 1.23 V vs. RHE)                   | ~ 100 % (after 3h)        | [56]             |
| BiVO <sub>4</sub> /FeOOH/NiOOH                                            | 0.5 M phosphate buffer (pH=7)                                                             | 4.2 (at 1.23 V vs. RHE)                    | ~ 100 % (after 48h)       | [11]             |
| BiVO <sub>4</sub> /PbS/ZnS                                                | 0.5 M KH <sub>2</sub> PO <sub>4</sub> with 1.0 M Na <sub>2</sub> SO <sub>3</sub> (pH = 7) | 5.19 (at 1.23 V vs. RHE)                   | ~ 97 % (after 2h)         | <u>This work</u> |
